# Supplementary material
Source: PubMed Central journal article supplement (PMC3816345)
Supplement: supp_kws554_kws554_Web_Figures.pdf [file supp_kws554_kws554_Web_Figures.pdf]

## **Legends**

**Web Figure 1.** Course of disability in all 13 activities over the 6-month follow-up period among participants who were hospitalized for a hip fracture, other fall-related injury, and non-fall-related reason, respectively, New Haven, Connecticut, 1998–2010. Results include only the first fall-related hospitalization of each case participant along with their matched controls.

**Web Figure 2.** Course of disability in the four basic, five instrumental and four mobility activities over the 6-month follow-up period among participants who were hospitalized for a hip fracture, other fall-related injury, and non-fall-related reason, respectively, New Haven, Connecticut, 1998–2010. Results include only the first fall-related hospitalization of each case participant along with their matched controls.

### All Activities

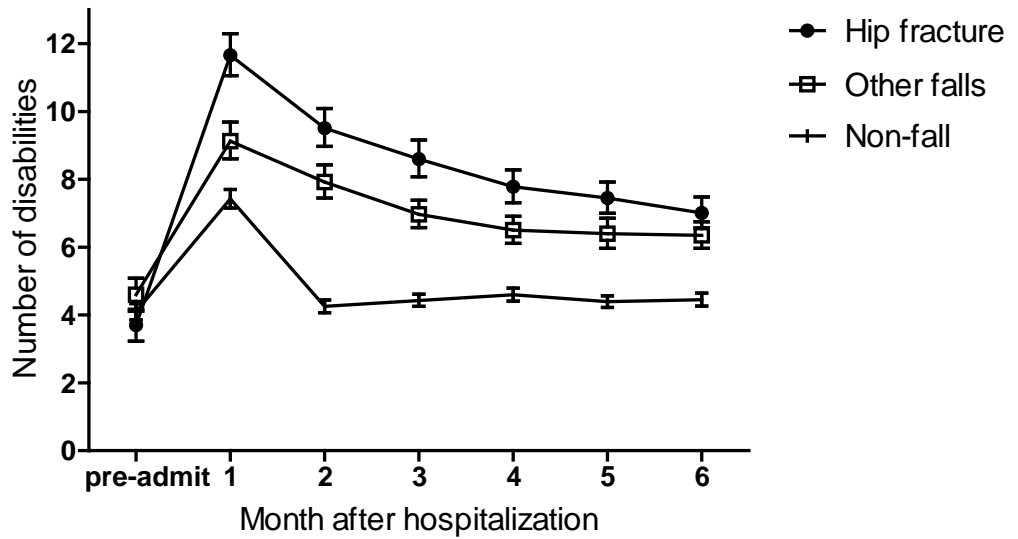

| No. of observations |            | pre-admit | 1   | 2   | 3   | 4   | 5   | 6   |
|---------------------|------------|-----------|-----|-----|-----|-----|-----|-----|
| Hip fracture        | Risk ratio | --        | 1.6 | 2.2 | 1.9 | 1.7 | 1.7 | 1.6 |
|                     | 95% LL     | --        | 1.4 | 1.9 | 1.7 | 1.5 | 1.5 | 1.3 |
|                     | 95% UL     | --        | 1.8 | 2.6 | 2.2 | 2.0 | 2.0 | 1.8 |
| No. of observations |            | 49        | 49  | 46  | 45  | 44  | 44  | 43  |
| Other falls         | Risk ratio | --        | 1.2 | 1.9 | 1.6 | 1.4 | 1.5 | 1.4 |
|                     | 95% LL     | --        | 1.1 | 1.6 | 1.4 | 1.2 | 1.3 | 1.2 |
|                     | 95% UL     | --        | 1.4 | 2.2 | 1.8 | 1.6 | 1.7 | 1.6 |
| No. of observations |            | 58        | 58  | 57  | 55  | 55  | 54  | 54  |
| Non-fall            | Risk ratio | --        | 1.0 | 1.0 | 1.0 | 1.0 | 1.0 | 1.0 |
| No. of observations |            | 211       | 211 | 201 | 195 | 189 | 188 | 188 |

### Basic Activities

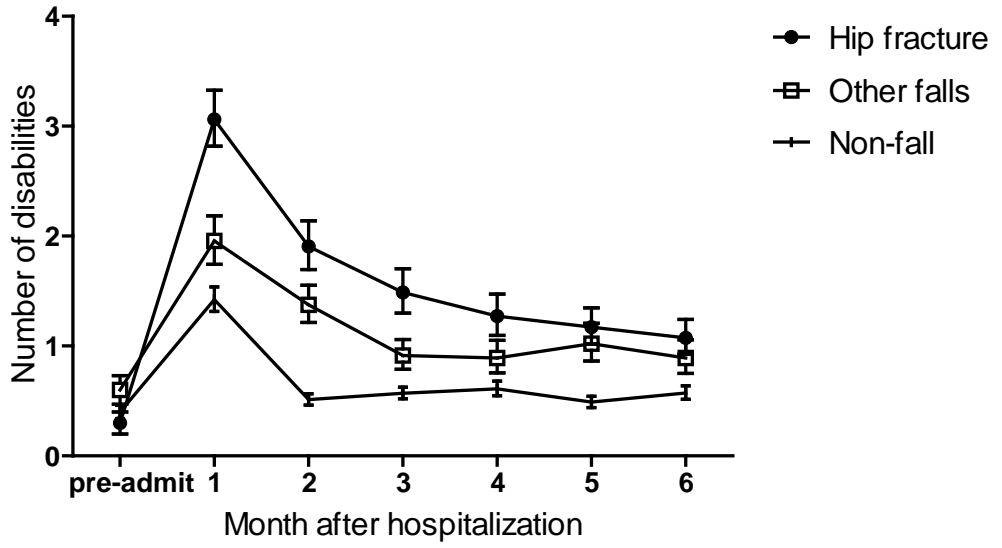

|              |            |    |     |     |     |     |     |     |
|--------------|------------|----|-----|-----|-----|-----|-----|-----|
| Hip fracture | Risk ratio | -- | 2.2 | 3.7 | 2.6 | 2.1 | 2.4 | 1.9 |
|              | 95% LL     | -- | 1.8 | 2.7 | 1.9 | 1.5 | 1.7 | 1.3 |
|              | 95% UL     | -- | 2.6 | 5.1 | 3.5 | 2.9 | 3.3 | 2.6 |
| Other falls  | Risk ratio | -- | 1.4 | 2.7 | 1.6 | 1.5 | 2.1 | 1.6 |
|              | 95% LL     | -- | 1.1 | 2.0 | 1.2 | 1.0 | 1.4 | 1.1 |
|              | 95% UL     | -- | 1.7 | 3.5 | 2.2 | 2.1 | 3.1 | 2.3 |

### Instrumental Activities

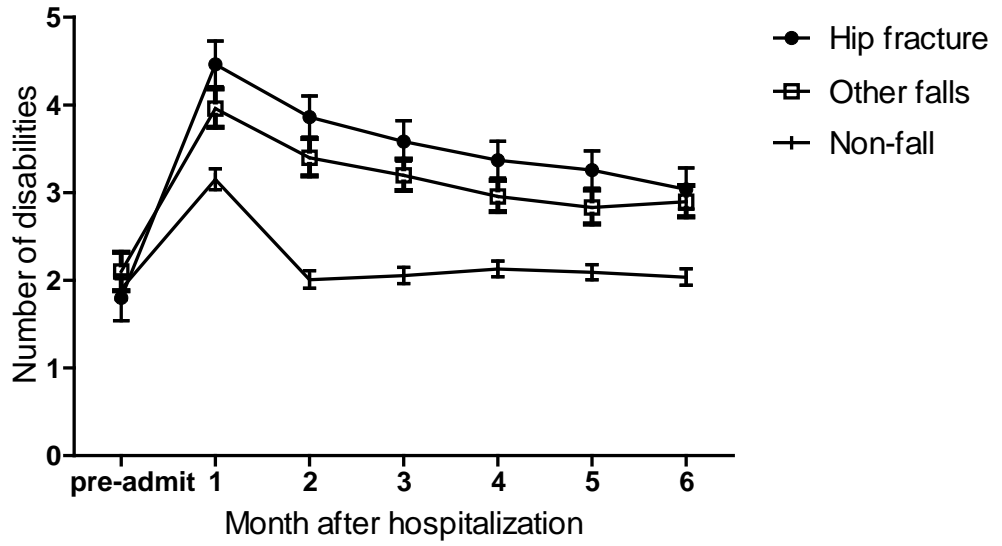

|              |            |    |     |     |     |     |     |     |
|--------------|------------|----|-----|-----|-----|-----|-----|-----|
| Hip fracture | Risk ratio | -- | 1.4 | 1.9 | 1.7 | 1.6 | 1.6 | 1.5 |
|              | 95% LL     | -- | 1.3 | 1.7 | 1.5 | 1.4 | 1.3 | 1.2 |
|              | 95% UL     | -- | 1.6 | 2.2 | 2.0 | 1.8 | 1.8 | 1.8 |
| Other falls  | Risk ratio | -- | 1.3 | 1.7 | 1.6 | 1.4 | 1.4 | 1.4 |
|              | 95% LL     | -- | 1.1 | 1.4 | 1.4 | 1.2 | 1.2 | 1.2 |
|              | 95% UL     | -- | 1.4 | 2.0 | 1.8 | 1.6 | 1.6 | 1.7 |

### Mobility Activities

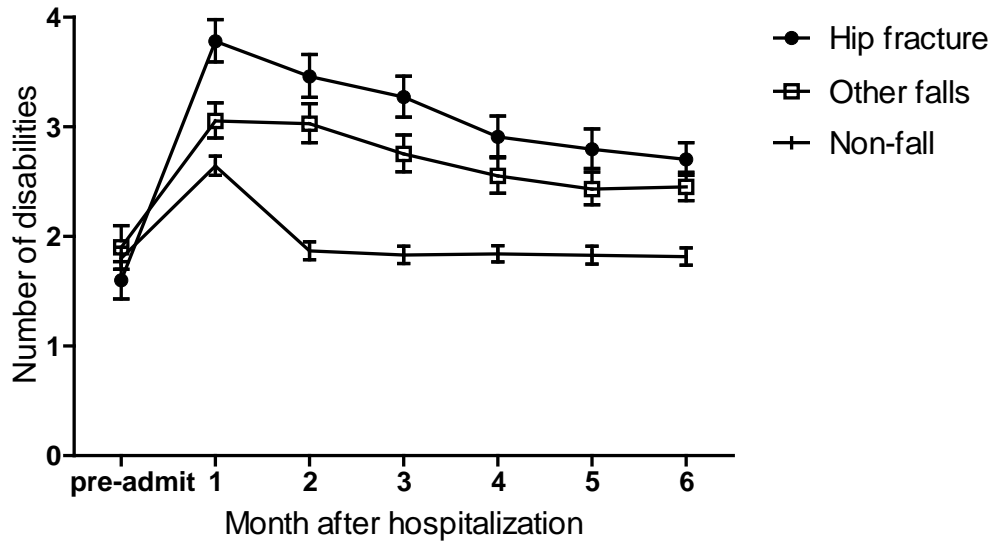

|                     |                   |    |     |     |     |     |     |     |
|---------------------|-------------------|----|-----|-----|-----|-----|-----|-----|
| <b>Hip fracture</b> | <b>Risk ratio</b> | -- | 1.4 | 1.9 | 1.8 | 1.6 | 1.5 | 1.5 |
|                     | <b>95% LL</b>     | -- | 1.3 | 1.6 | 1.6 | 1.4 | 1.3 | 1.3 |
|                     | <b>95% UL</b>     | -- | 1.6 | 2.1 | 2.0 | 1.8 | 1.8 | 1.7 |
| <b>Other falls</b>  | <b>Risk ratio</b> | -- | 1.2 | 1.6 | 1.5 | 1.4 | 1.3 | 1.4 |
|                     | <b>95% LL</b>     | -- | 1.0 | 1.4 | 1.3 | 1.2 | 1.2 | 1.2 |
|                     | <b>95% UL</b>     | -- | 1.3 | 1.9 | 1.7 | 1.6 | 1.5 | 1.5 |
